# Supplementary material for: One-step synthesis of a multi-functional imidazole luminescent sensor with AIE, acid-responsive, and sulfate-sensing properties
Source: Royal Society of Chemistry journal article supplement (doi:10.1039/d6ra01574c), 2026-04-21
Supplement: d6ra01574c1.pdf [file d6ra01574c1.pdf]

## One-Step Synthesis of a Multi-Functional Imidazole Luminescent Sensor with AIE, Acid-Responsive, and Sulfate-Sensing Properties

Pawan Kumar\*

Department of Chemistry, Govt. Degree College, Doda, UTJ&K, 182202 India.

E-mail: [pawantandon169@gmail.com](mailto:pawantandon169@gmail.com)

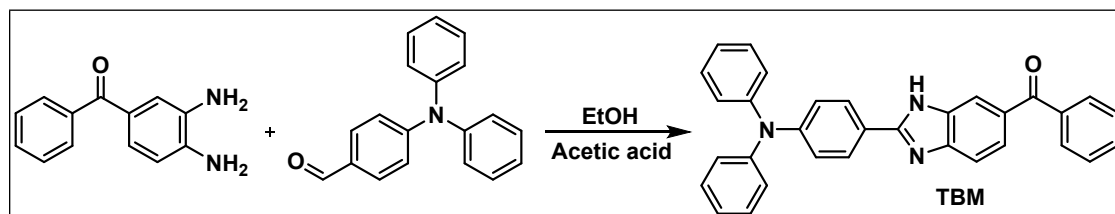

**Scheme :1.** Synthesis of imidazole based chemosensor TBM.

### 1. Experimental section

#### Synthesis of triphenylamine-1H-benzimidazole(phenyl)methanone (TBM).

The mixing triphenylamine carboxaldehyde (0.5 g, 0.001 mol) and 2,3-diaminobenzophenone (0.38 g, 0.001 mol) in 3 ml ethanol is accomplished by adding three drops of acetic acid as a catalyst and stirring at room temperature for three hours. Completion of reaction confirmed through TLC in hexane: ethyl acetate (7:3% v/v), as well as filtering and drying the precipitate over the rotavapor. Product **TBM** was obtained in 91% yield.  $^1\text{H}$  NMR (500 MHz,  $\text{CDCl}_3$ , 25  $^\circ\text{C}$ )  $\delta$ /ppm: 7.13 (m 8H, 8  $\times$  ArH), 7.28 (t,  $J=7.5$ , 4H, 4  $\times$  ArH), 7.43 (t,  $J=7.5$ , 2H, 2  $\times$  ArH) 7.54 (m 2H, 2  $\times$  ArH), 7.80 (m 3H, 3  $\times$  ArH) 7.96 (d,  $J=8.5$ , 2H, 2  $\times$  ArH) 8.09 (s, 1H, 1  $\times$  ArH).  $^{13}\text{C}$  NMR (125 MHz,  $\text{CDCl}_3$ , 25  $^\circ\text{C}$ )  $\delta$ /ppm: 121.67, 124.14, 125.48, 127.91, 128.18, 129.54, 130.01, 132.02, 138.35, 146.83, 150.15. HRMS:  $m/z$  calculated for  $\text{C}_{32}\text{H}_{23}\text{N}_3\text{O}$ : 466.1875. Found: 466.1977.

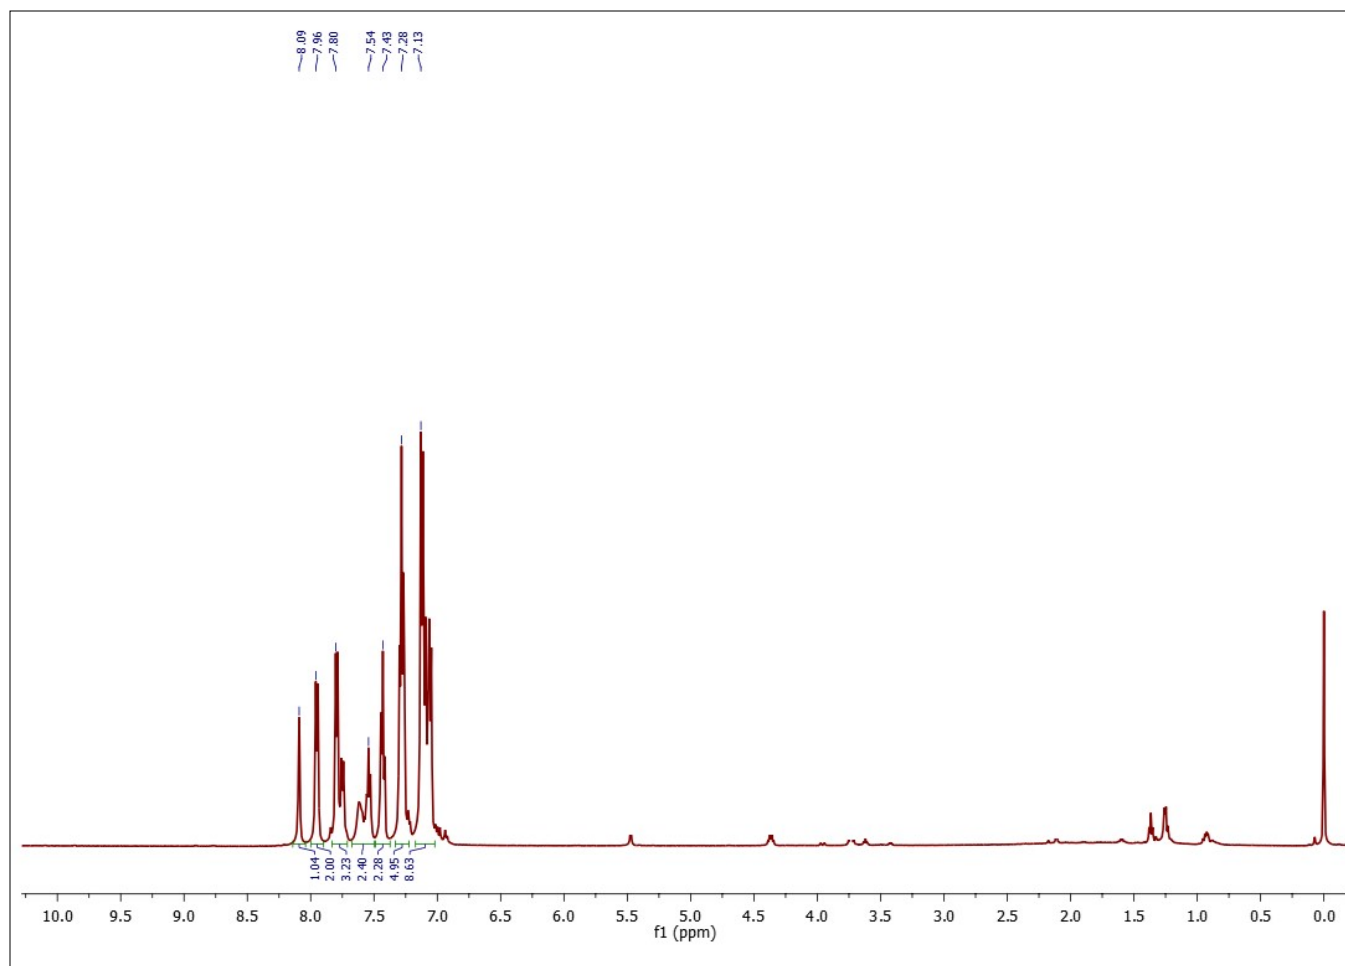

**Figure S1.** <sup>1</sup>H NMR (500 MHz, CDCl<sub>3</sub>) of TBM.

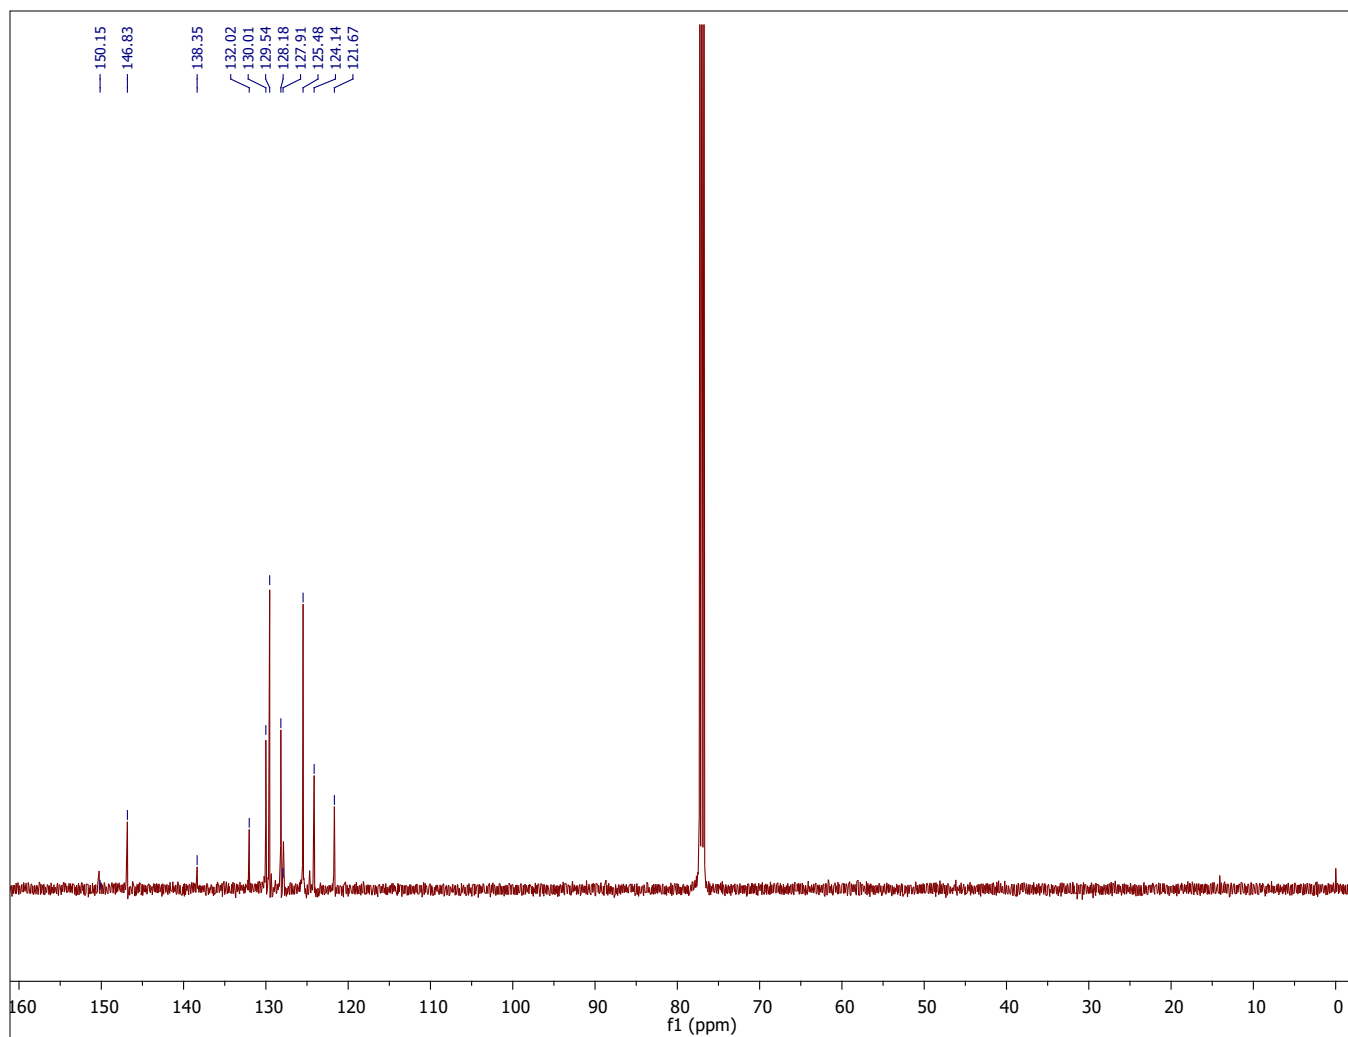

**Figure S2.**  $^{13}\text{C}$  NMR (500 MHz,  $\text{CDCl}_3$ ) of TBM.

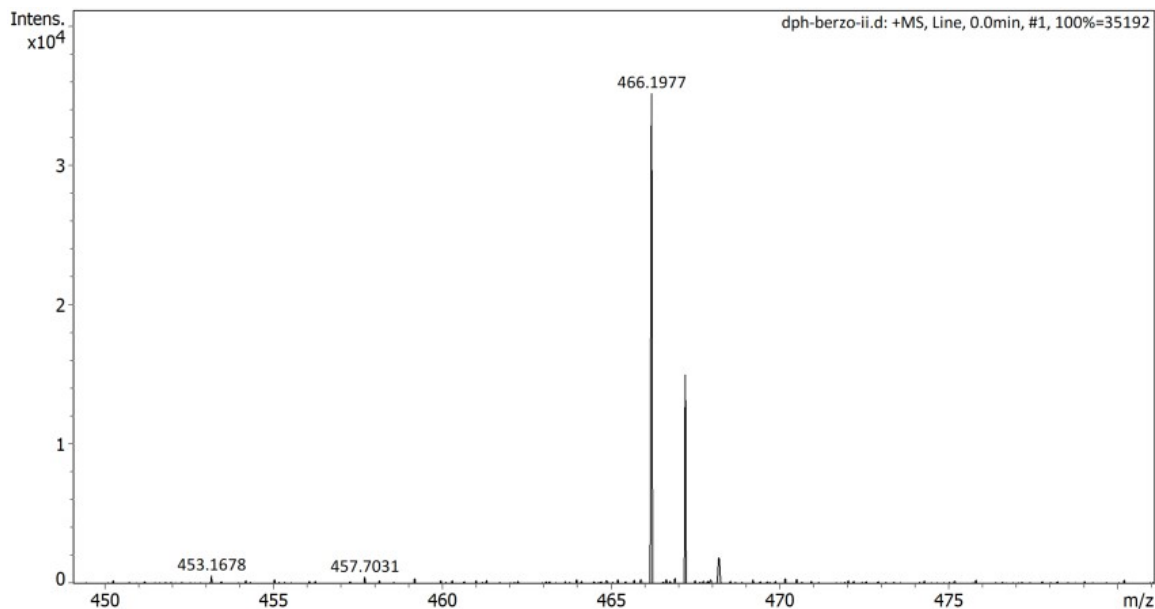

**Figure S3.** HRMS spectrum of TBM.

### Dynamic Light Scattering (DLS) Method

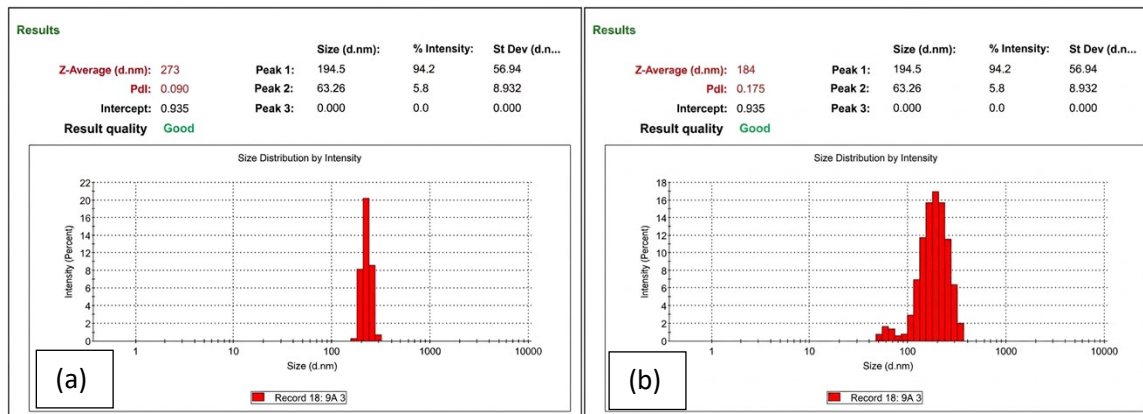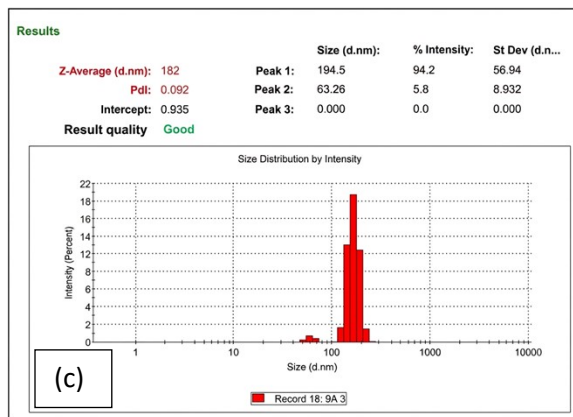

**Figure S4.** Size distribution measured by the dynamic light scattering (DLS) method for TBM ( $1 \times 10^{-5}$  M) in different fractions of water in CH<sub>3</sub>CN: (a) CH<sub>3</sub>CN:H<sub>2</sub>O = 40:60 (v/v), (b) CH<sub>3</sub>CN:H<sub>2</sub>O = 20:80 (v/v), and (c) CH<sub>3</sub>CN:H<sub>2</sub>O = 10:90 (v/v). The average particle sizes were 273, 184, and 182 nm, with corresponding polydispersity index (PDI) values of 0.090, 0.175, and 0.092, respectively.

### Quantum yield calculations

The fluorescence quantum yields were calculated using equation 1. Quinine sulphate having quantum yield of 0.54 in 0.1M of sulphuric acid was used as standard.

$$\phi_S = \frac{1 - 10^{-A_{ref}} \times I_S \times \eta_S^2}{1 - 10^{-A_S} \times I_{ref} \times \eta_{ref}^2} \times \phi_{ref} \quad (S1)$$

$I_S$  and  $I_{ref}$  represent the area under the fluorescence spectral curve of the sample and the reference, respectively.  $A_S$  and  $A_{ref}$  are optical densities of the sample and the reference compounds, respectively at the excitation wavelengths and  $\eta$  is the refractive index of the solvents.
